# Supplementary material for: A Link between Prenatal Stage of Life during the Great Chinese Famine and Subsequent Depressive Symptoms among Middle-Aged and Older Adults
Source: MDPI journal article supplement (doi:10.3390/nu15214600), 2023-10-29

**Table S1.** Characteristics of participants, CHARLS, 2011, *N* (%)

| Characteristics              | All participants (n=5391) |                   |                  | Pre-famine (n=1624) |                   |                  | Famine (n=1812) |                   |                  | Post-famine (n=1955) |                   |                  |
|------------------------------|---------------------------|-------------------|------------------|---------------------|-------------------|------------------|-----------------|-------------------|------------------|----------------------|-------------------|------------------|
|                              | Total                     | Rural<br>(n=4782) | Urban<br>(n=609) | Total               | Rural<br>(n=1456) | Urban<br>(n=168) | Total           | Rural<br>(n=1588) | Urban<br>(n=224) | Total                | Rural<br>(n=1738) | Urban<br>(n=217) |
| Total                        |                           |                   |                  |                     |                   |                  |                 |                   |                  |                      |                   |                  |
| Marital status               |                           |                   |                  |                     |                   |                  |                 |                   |                  |                      |                   |                  |
| Living with spouse           | 4758<br>(88.3)            | 4222 (88.3)       | 536 (88.0)       | 1432<br>(88.2)      | 1289<br>(88.5)    | 143<br>(85.1)    | 1595<br>(88.0)  | 1401<br>(88.2)    | 194 (86.6)       | 1731<br>(88.5)       | 1532<br>(88.2)    | 199<br>(91.7)    |
| Living without spouse        | 633<br>(11.7)             | 560 (11.7)        | 73 (12.0)        | 192 (11.8)          | 167<br>(11.5)     | 25 (14.9)        | 217<br>(12.0)   | 187<br>(11.8)     | 30 (13.4)        | 224<br>(11.5)        | 206 (11.8)        | 18 (8.3)         |
| Education                    |                           |                   |                  |                     |                   |                  |                 |                   |                  |                      |                   |                  |
| Primary school and below     | 2639<br>(49.0)            | 2551 (53.4)       | 88 (14.4)        | 937 (57.7)          | 899<br>(61.7)     | 38 (22.6)        | 806<br>(44.5)   | 772<br>(48.6)     | 34 (15.2)        | 896<br>(45.8)        | 880 (50.6)        | 16 (7.4)         |
| Junior high school and above | 2752<br>(51.0)            | 2231 (46.6)       | 521 (85.5)       | 687 (42.3)          | 557<br>(38.3)     | 130<br>(77.4)    | 1006<br>(55.5)  | 816<br>(51.4)     | 190 (83.8)       | 1059<br>(54.2)       | 858 (49.4)        | 201<br>(92.5)    |
| Female (n=2927)              |                           |                   |                  |                     |                   |                  |                 |                   |                  |                      |                   |                  |
| Marital status               |                           |                   |                  |                     |                   |                  |                 |                   |                  |                      |                   |                  |
| Living with spouse           | 2520<br>(86.1)            | 2229 (86.1)       | 291 (86.1)       | 706 (85.8)          | 631<br>(86.3)     | 75 (81.5)        | 850<br>(85.3)   | 753<br>(85.5)     | 97 (83.6)        | 964<br>(87.1)        | 845 (86.5)        | 119<br>(91.5)    |
| Living without spouse        | 407<br>(13.9)             | 360 (13.9)        | 47 (13.9)        | 117 (14.2)          | 100<br>(13.7)     | 17 (18.5)        | 147<br>(14.7)   | 128<br>(14.5)     | 19 (16.4)        | 143<br>(12.9)        | 132 (13.5)        | 11 (8.5)         |
| Education                    |                           |                   |                  |                     |                   |                  |                 |                   |                  |                      |                   |                  |
| Primary school and below     | 1756<br>(60.0)            | 1703 (65.8)       | 53 (15.7)        | 589(71.6)           | 565<br>(77.3)     | 24 (26.1)        | 561<br>(56.3)   | 543<br>(61.6)     | 19 (15.5)        | 606<br>(54.7)        | 595 (60.9)        | 11 (8.5)         |
| Junior high school and above | 1171                      | 886 (34.2)        | 285 (84.3)       | 687 (28.4)          | 166               | 68 (73.9)        | 436             | 338               | 98 (84.5)        | 501                  | 382 (39.1)        | 119              |

|                              |                |             |            |            |               |           |               |               |           |               |            |              |
|------------------------------|----------------|-------------|------------|------------|---------------|-----------|---------------|---------------|-----------|---------------|------------|--------------|
|                              | (40.0)         |             |            |            | (22.7)        |           | (43.7)        | (38.4)        |           | (45.3)        |            | (91.5)       |
| Male (n=2464)                |                |             |            |            |               |           |               |               |           |               |            |              |
| Marital status               |                |             |            |            |               |           |               |               |           |               |            |              |
| Living with spouse           | 2238<br>(90.8) | 1993 (90.9) | 245 (90.4) | 726 (90.6) | 658<br>(90.8) | 68 (89.5) | 745<br>(91.4) | 648<br>(91.6) | 97 (89.8) | 767<br>(90.4) | 687 (90.3) | 80<br>(92.0) |
| Living without spouse        | 226 (9.2)      | 200 (9.1)   | 26 (9.6)   | 75 (9.4)   | 67 (9.2)      | 8 (10.5)  | 70<br>(8.6)   | 59 (8.4)      | 11 (10.2) | 81<br>(9.6)   | 74 (9.7)   | 7 (8.0)      |
| Education                    |                |             |            |            |               |           |               |               |           |               |            |              |
| Primary school and below     | 883(35.8)      | 848 (36.7)  | 35 (12.9)  | 348 (43.4) | 334<br>(46.1) | 14 (18.4) | 245<br>(30.1) | 229<br>(32.4) | 16 (14.8) | 290<br>(34.2) | 285 (37.4) | 5 (5.8)      |
| Junior high school and above | 1581<br>(64.2) | 1345 (61.3) | 236 (87.1) | 453 (56.6) | 391<br>(53.9) | 62 (81.6) | 570<br>(69.9) | 478<br>(67.6) | 92 (85.2) | 558<br>(65.8) | 476 (62.5) | 82<br>(94.2) |

**Table S2.** Stratified distributions of CES-D 10 scores among participants, CHARLS, 2011, median (IQR)

| Characteristics              | Pre-famine (n=1624) |                   |                  | Famine (n=1812) |                   |                  | Post-famine (n=1955) |                   |                  |
|------------------------------|---------------------|-------------------|------------------|-----------------|-------------------|------------------|----------------------|-------------------|------------------|
|                              | Total               | Rural<br>(n=1456) | Urban<br>(n=168) | Total           | Rural<br>(n=1588) | Urban<br>(n=224) | Total                | Rural<br>(n=1738) | Urban<br>(n=217) |
| Female (n=2927)              | 8.0 (10.0)          | 8.0 (10.0)        | 4.0 (6.0)        | 7.0 (8.0)       | 8.0(9.0)          | 5.0 (5.0)        | 7.0 (8.0)            | 7.0 (8.0)         | 5.0 (6.0)        |
| Marital status               |                     |                   |                  |                 |                   |                  |                      |                   |                  |
| Living with spouse           | 7.0 (9.0)           | 8.0 (9.0)         | 4.0 (6.0)        | 7.0 (8.0)       | 7.0 (8.0)         | 5.0 (6.0)        | 7.0 (8.0)            | 7.0 (7.5)         | 4.0 (6.0)        |
| Living without spouse        | 10.0 (11.0)         | 10.0 (11.0)       | 5.0 (11.0)       | 9.0 (10.0)      | 10.0 (9.0)        | 5.5 (4.0)        | 8.0 (9.0)            | 9.0 (9.0)         | 5.0 (6.0)        |
| Education                    |                     |                   |                  |                 |                   |                  |                      |                   |                  |
| Primary school and below     | 9.0 (10.0)          | 9.0 (10.0)        | 6.0 (14.0)       | 8.0 (9.0)       | 8.0 (9.0)         | 6.0 (4.0)        | 8.0 (8.0)            | 8.0 (8.0)         | 7.0 (7.0)        |
| Junior high school and above | 5.0 (8.0)           | 6.0 (8.0)         | 4.0 (5.0)        | 6.0 (8.0)       | 7.0 (12.0)        | 5.0 (4.5)        | 6.0 (6.0)            | 6.0 (7.0)         | 4.0 (6.0)        |
| Male (n=2464)                | 6.0 (7.0)           | 6.0 (8.0)         | 6.0 (8.0)        | 5.0 (8.0)       | 5.0 (7.0)         | 3.5 (6.0)        | 5.0 (7.0)            | 5.0 (8.0)         | 4.0 (4.5)        |
| Marital status               |                     |                   |                  |                 |                   |                  |                      |                   |                  |
| Living with spouse           | 5.0 (7.0)           | 5.0 (7.0)         | 5.5 (8.0)        | 5.0 (7.0)       | 5.0 (8.0)         | 3.0 (6.0)        | 5.0 (7.0)            | 5.0 (7.0)         | 3.0 (4.0)        |
| Living without spouse        | 9.5 (10.5)          | 9.0 (11.5)        | 11.0 (4.5)       | 7.0 (9.0)       | 8.0 (9.0)         | 6.0 (13.0)       | 7.5 (11.0)           | 7.5 (11.0)        | 9.0 (10.0)       |
| Education                    |                     |                   |                  |                 |                   |                  |                      |                   |                  |
| Primary school and below     | 6.0 (8.0)           | 6.0 (8.0)         | 6.0 (10.0)       | 7.0 (8.0)       | 7.0 (8.0)         | 3.0 (3.0)        | 7.0 (8.0)            | 7.0 (8.0)         | 7.5 (8.0)        |
| Junior high school and above | 5.0 (6.0)           | 5.0 (6.0)         | 6.0 (6.5)        | 4.0 (7.0)       | 5.0 (7.0)         | 4.0 (6.0)        | 4.0 (6.0)            | 4.0 (6.0)         | 4.0 (4.0)        |

Note: IQR, interquartile range.

**Table S3.** The placebo test of difference-in-differences estimates of prenatal famine exposure and depressive symptoms

|                                    | Unadjusted $\beta$ (95% CI) | <i>p</i> | Adjusted $\beta$ (95% CI)       | <i>p</i> |
|------------------------------------|-----------------------------|----------|---------------------------------|----------|
| Overall participants               |                             |          |                                 |          |
| Control cohort (1949–1953)         | Reference                   |          | Reference                       |          |
| Placebo-treated cohort (1954–1958) | -0.28 (-3.23,2.68)          | 0.853    | 0.37 (-2.54,3.27) <sup>a</sup>  | 0.800    |
| Rural                              |                             |          |                                 |          |
| Control cohort (1949–1953)         | Reference                   |          | Reference                       |          |
| Placebo-treated cohort (1954–1958) | 0.22 (-3.09,3.54)           | 0.985    | -0.86 (-7.55,5.83) <sup>b</sup> | 0.775    |
| Urban                              |                             |          |                                 |          |
| Control cohort (1949–1953)         | Reference                   |          | Reference                       |          |
| Placebo-treated cohort (1954–1958) | 0.48 (-2.79,3.74)           | 0.801    | 0.79 (-5.78,7.37) <sup>b</sup>  | 0.813    |

Note: CI: confidence interval

<sup>a</sup> Adjusted for residence, sex, marital status, education;

<sup>b</sup> Adjusted for sex, marital status, education.

**Figure S1.** Flow chart of study participants

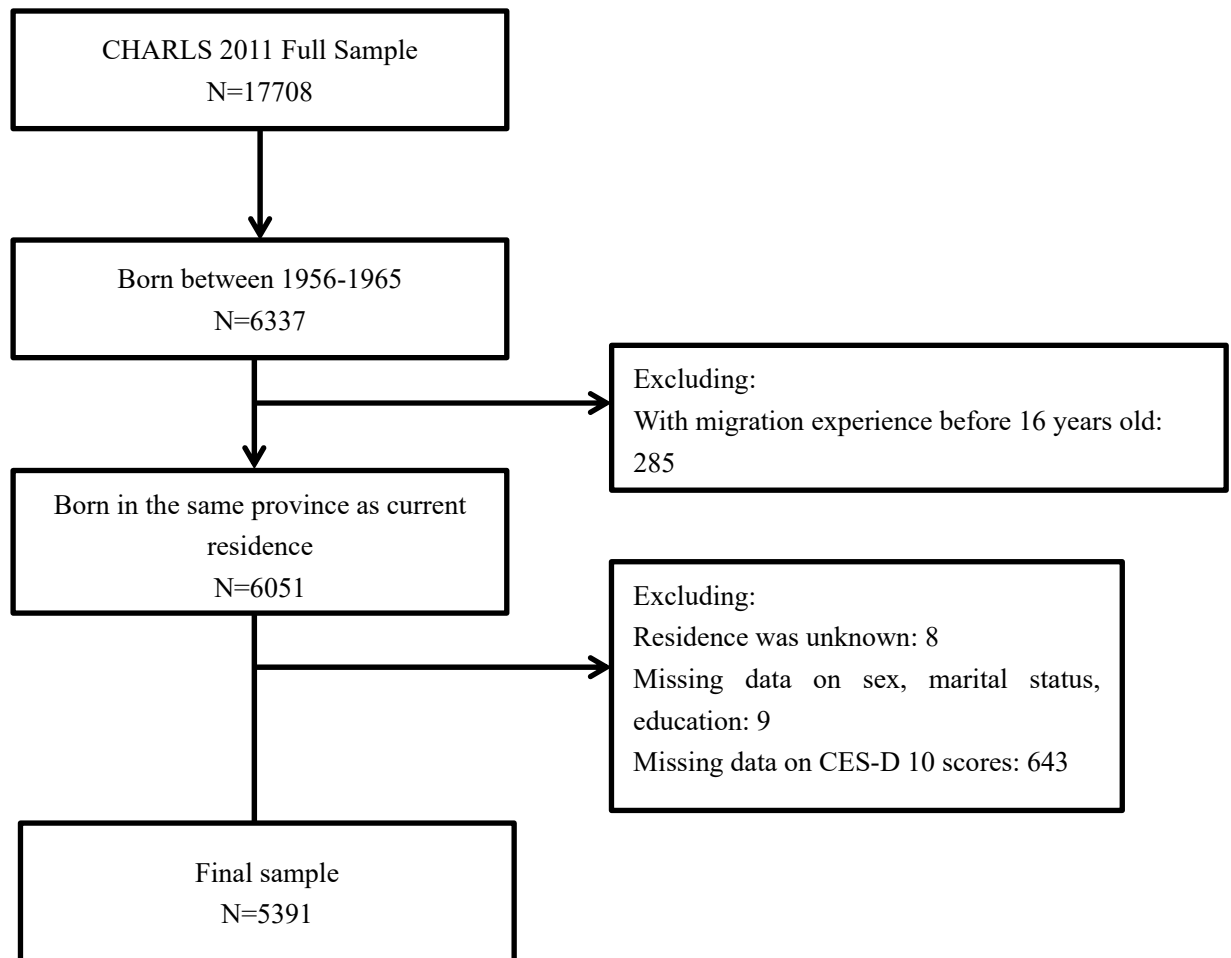

Supplement: s1 [file s1]
